# Supplementary material for: Primary Vitamin D Target Genes of Human Monocytes
Source: Front Physiol. 2019 Mar 5;10:194. doi: 10.3389/fphys.2019.00194 (PMC6411690; doi:10.3389/fphys.2019.00194)
Supplement: Supplementary file 2 [file Table_1.XLSX]

## Sheet: 273 and VN.txt
Gene	Chr	Start	End	Peaks at TSS	Ligand-dependent peaks at TSS	Enhancer start	Enhancer end	Enhancer distance from TSS (kb)	Enhancer close to TSS?	Peaks at enhancer	LD peaks at enhancer	Class?	FC (24 h)	Gene function	Immune system related?	Cellular location
ABCD2	chr12	40013415	40013417	VDR, H3K4me3 & H3K27ac	LD H3K4me3	39538110	39540015	474.353	No	VDR, PU.1, H3K4me3 & H3K27ac	LD H3K4me3	1	33.68	Transport	No	Peroxisome
ACSL1	chr4	185747070	185747215	VDR, H3K4me3 & H3K27ac	LD H3K4me3	185775289	185777146	29.1475	No	VDR, CEBPA, PU.1 & H3K27ac	LD VDR & PU.1	1	3.52	Enzyme	No	Mitochondrion
ACVRL1	chr12	52301202	52301479	VDR, H3K4me3, H3K27ac & PU.1	LD H3K4me3 & VDR	52304904	52307393	4.9465	No	VDR, PU.1, H3K4me3 & H3K27ac	LD VDR & H3K4me3	1	2.68	Receptor	No	Membrane
ARHGEF16	chr1	3371147	3371375	VDR, H3K4me3, H3K27ac & PU.1	LD H3K4me3 & VDR	3371069	3372218	0.4965	Yes	VDR, PU.1, H3K4me3 & H3K27ac	LD VDR & H3K4me3	1	4.9	Involved in protein-protein and protein-lipid interactions	No	Cytosol
ARHGEF2	chr1	155947858	155947966	VDR, H3K4me3, H3K27ac & PU.1	LD H3K4me3	155944451	155947056	2.1045	No	VDR, PU.1, H3K4me3 & H3K27ac	LD H3K4me3	1	2.25	Signal transduction	Yes	Membrane
CAMP	chr3	48264837	48265202	VDR, H3K27ac, PU.1 & CEBPA,	LD VDR	48263870	48264788	0.508	Yes	VDR, CEBPA, PU.1 & H3K27ac	LD VDR	1	122.78	Antimicrobial peptide	Yes	Extracellular
CD14	chr5	140012654	140013035	VDR, H3K4me3, H3K27ac, PU.1 & CEBPA	LD H3K4me3	139985811	139989553	24.972	No	VDR, CEBPA, PU.1 & H3K27ac	LD VDR, CEBPA, PU.1 & H3K27ac	1	138.39	Receptor	Yes	Membrane
CD274	chr9	5450503	5450596	VDR, H3K4me3, H3K27ac & PU.1	LD H3K4me3 & VDR	5449140	5450339	0.7635	Yes	VDR, PU.1, H3K4me3 & H3K27ac	LD VDR & H3K4me3	1	3.96	Immune inhibitory receptor ligand	Yes	Membrane
CD300LF	chr17	72709003	72709005	VDR, H3K4me3, H3K27ac & PU.1	LD H3K4me3	72732133	72735129	24.628	No	VDR, CEBPA, PU.1, H3K4me3 & H3K27ac	LD H3K4me3	1	1.74	Receptor	Yes	Membrane
CFLAR	chr2	201980877	201981204	VDR, H3K4me3, H3K27ac, PU.1 & CEBPA	LD H3K4me3	201982690	201983770	2.353	No	VDR, H3K4me3 & H3K27ac	LD H3K4me3	1	1.68	Regulator of apoptosis	No	Membrane
CTSZ	chr20	57582181	57582183	VDR, H3K4me3 & H3K27ac	LD H3K4me3 & H3K27ac	57579023	57580905	2.217	No	VDR, PU.1, H3K4me3 & H3K27ac	LD VDR, H3K4me3 & H3K27ac	1	2.44	Enzyme	No	Membrane
DENND6B	chr22	50765415	50765417	VDR, H3K4me3 & H3K27ac	LD H3K4me3	50751922	50754357	12.2755	No	VDR, PU.1, H3K4me3 & H3K27ac	LD VDR, PU.1 & H3K4me3	1	7.94	Guanine nucleotide exchange factor (GEF) for RAB14	No	Cytosol
DNASE2	chr19	12992187	12992189	VDR, H3K4me3, H3K27ac & PU.1	LD H3K4me3	12994207	12994954	2.3935	No	VDR, CEBPA & PU.1	LD VDR	1	4.38	Enzyme	No	Lysosome
FBP1	chr9	97401590	97401592	VDR, H3K4me3, H3K27ac, PU.1 & CEBPA	LD H3K4me3	97410724	97412722	10.133	No	VDR, CEBPA, PU.1 & H3K27ac	LD H3K27ac	1	83.35	Enzyme	No	Extracellular
G0S2	chr1	209848670	209848894	VDR, H3K4me3, H3K27ac & PU.1	LD H3K4me3	209832999	209833870	15.2355	No	VDR, CEBPA & PU.1	LD VDR	1	26.91	Promotes apoptosis by binding to BCL2	No	Mitochondrion
GADD45B	chr19	2476123	2476400	VDR, H3K4me3, H3K27ac & CEBPA	LD H3K4me3	2476285	2477610	0.8245	Yes	VDR, CEBPA, PU.1, H3K4me3 & H3K27ac	LD H3K4me3	1	1.66	Involved in the regulation of growth and apoptosis	No	Nucleus
GLIPR1	chr12	75874513	75874834	VDR, H3K4me3, H3K27ac, PU.1 & CEBPA	LD H3K27ac & VDR	75874695	75876023	0.846	Yes	VDR, CEBPA, PU.1, H3K4me3 & H3K27ac	LD H3K27ac	1	1.77	protein with similarity to pathogenesis-related protein and cysteine-rich secretory protein amily	No	Membrane
GM2A	chr5	150632613	150632858	VDR, H3K4me3, H3K27ac, PU.1 & CEBPA	LD H3K4me3 & H3K27ac	150632911	150633869	0.777	Yes	VDR, H3K4me3 & H3K27ac	LD H3K4me3 & H3K27ac	1	2.49	Transport	No	Extracellular
ICAM1	chr19	10381517	10381902	VDR, H3K4me3, H3K27ac & PU.1	LD H3K4me3	10380689	10381380	0.4825	Yes	VDR, PU.1, H3K4me3 & H3K27ac	LD H3K4me3	1	3.5	Cell surface glycoprotein	Yes	Membrane
IGFBP7	chr4	57976515	57976517	VDR, H3K4me3, H3K27ac & PU.1	LD H3K4me3	57976390	57978180	0.77	Yes	VDR, PU.1, H3K4me3 & H3K27ac	LD H3K4me3	1	1.86	Regulates IGF availability	No	Extracellular
INSR	chr19	7293900	7293902	VDR, H3K4me3 & H3K27ac	LD H3K4me3	7272499	7273671	20.815	No	VDR, CEBPA, PU.1, H3K4me3 & H3K27ac	LD VDR, CEBPA & PU.1	1	2.92	Receptor	No	Membrane
ITSN1	chr21	35014784	35015019	VDR, H3K4me3 & H3K27ac	LD H3K4me3	34991158	34993150	22.63	No	VDR, CEBPA, PU.1 & H3K27ac	LD VDR & CEBPA	1	6.12	Adaptor	No	Membrane
LAMB3	chr1	209824287	209824289	VDR, H3K27ac, PU.1 & CEBPA,	no LD	209823534	209824940	0.05	Yes	VDR, CEBPA, PU.1 & H3K27ac	LD PU.1	1	6.78	basement membrane protein	No	Extracellular
LCP2	chr5	169724613	169724615	VDR, H3K4me3, H3K27ac & PU.1	LD H3K4me3	169726948	169728760	3.241	No	VDR, CEBPA, PU.1 & H3K27ac	LD VDR	1	2.17	Aadaptor	Yes	Membrane
LRG1	chr19	4540023	4540025	VDR, H3K4me3, H3K27ac, PU.1 & CEBPA	LD H3K4me3	4542280	4544994	3.614	No	VDR, CEBPA, PU.1, H3K4me3 & H3K27ac	LD H3K4me3	1	1.62	Adaptor	Yes	Extracellular
LRRC25	chr19	18507771	18507773	VDR, H3K4me3, H3K27ac & PU.1	LD H3K4me3 & PU.1	18512275	18513478	5.1055	No	VDR, PU.1, H3K4me3 & H3K27ac	LD H3K27ac	1	9.9	Signal transduction	Yes	Membrane
NCOA4	chr10	51565108	51565296	VDR, H3K4me3, H3K27ac & PU.1	LD H3K4me3 & H3K27ac	51571508	51573145	7.2185	No	VDR, PU.1, H3K4me3 & H3K27ac	LD H3K4me3 & H3K27ac	1	3.82	Coactivator	No	Nucleus
NFE2	chr12	54689328	54689563	VDR, H3K4me3, H3K27ac & PU.1	LD H3K4me3	54697472	54698759	8.7875	No	VDR, CEBPA, PU.1, H3K4me3 & H3K27ac	LD VDR &H3K4me3	1	7.34	Transcription factor	No	Nucleus
NFKBIA	chr14	35873848	35873850	VDR, H3K4me3, H3K27ac & PU.1	LD H3K4me3	35872652	35873510	0.767	Yes	VDR, CEBPA, PU.1, H3K4me3 & H3K27ac	LD H3K4me3	1	1.64	NFKB inhibitor	Yes	cytosol
NRIP1	chr21	16437066	16437126	VDR, H3K4me3, H3K27ac & PU.1	LD H3K4me3	16578044	16580152	142.032	No	VDR, CEBPA, PU.1 & H3K27ac	LD VDR, CEBPA & PU.1	1	2.3	Modulates the function of transcription factors	No	Nucleus
OCEL1	chr19	17337055	17337125	VDR, H3K4me3, H3K27ac & PU.1	LD H3K4me3 & H3K27ac	17294005	17295790	42.1575	No	VDR, PU.1 & H3K27ac	LD VDR	1	1.94	Undefined	No	Nucleus
PDE4DIP	chr1	144931706	144931708	VDR, H3K4me3, H3K27ac & PU.1	LD H3K4me3 & H3K27ac	144920911	144922407	10.047	No	VDR, CEBPA, H3K4me3 & H3K27ac	LD H3K4me3	1	1.74	Adaptor	No	Cytoskeleton
PDLIM4	chr5	131593351	131593520	VDR, H3K4me3, H3K27ac & PU.1	LD H3K4me3, H3K27ac, VDR & PU.1	131758117	131759144	165.28	No	VDR, PU.1 & H3K27ac	LD VDR	1	4.03	Bone development	No	Membrane
PPARGC1B	chr5	149109815	149109983	VDR, H3K4me3 & H3K27ac	LD H3K4me3	149066796	149068433	42.2005	No	VDR, CEBPA, PU.1, H3K4me3 & H3K27ac	LD VDR, CEBPA, PU.1 & H3K4me3	1	6.06	Stimulator of transcription factors	No	Nucleus
PRKCH	chr14	61788515	61789182	VDR, H3K4me3 & H3K27ac	LD H3K4me3 & H3K27ac	61809949	61812978	22.9485	No	VDR, CEBPA, PU.1 & H3K27ac	LD CEBPA & H3K27ac	1	2.63	Enzyme	Yes	Membrane
RAB37	chr17	72667256	72667797	VDR, H3K4me3, H3K27ac, PU.1 & CEBPA	LD H3K4me3	72732133	72735129	66.375	No	VDR, CEBPA, PU.1, H3K4me3 & H3K27ac	LD H3K4me3	1	2.85	Enzyme	Yes	Membrane
RASSF2	chr20	4795748	4795769	VDR, H3K4me3, H3K27ac & PU.1	LD H3K4me3	4802594	4804139	7.6185	No	VDR, PU.1, H3K4me3 & H3K27ac	LD H3K4me3	1	2.21	Protein that contains a Ras association domain	No	Nucleus
RHOBTB3	chr5	95066850	95067388	VDR, H3K4me3, H3K27ac & PU.1	LD H3K4me3	95153346	95154899	87.2725	No	VDR, CEBPA, PU.1, H3K4me3 & H3K27ac	LD H3K4me3	1	2.15	Enzyme	No	Golgi apparatus
RPRD2	chr1	150336990	150337395	VDR, H3K4me3, H3K27ac & PU.1	LD H3K4me3	150335271	150336796	0.9565	Yes	VDR, CEBPA, PU.1, H3K4me3 & H3K27ac	LD H3K4me3	1	1.96	Undefined	No	Nucleus
SEMA6B	chr19	4559542	4559771	VDR, H3K4me3, H3K27ac & PU.1	LD H3K4me3	4561803	4562710	2.7145	No	VDR, CEBPA & PU.1	LD VDR	1	7.61	Semaphorin receptor binding	No	Membrane
SLC37A2	chr11	124933013	124933322	VDR, H3K4me3, H3K27ac & PU.1	LD H3K4me3 & PU.1	124938820	124943774	8.284	No	VDR, CEBPA, PU.1 & H3K27ac	LD VDR	1	12.13	Transport	No	Membrane
SLC7A2	chr8	17354597	17354746	VDR, H3K4me3 & H3K27ac	LD H3K4me3	17206437	17207946	147.405	No	VDR, CEBPA, PU.1, H3K4me3 & H3K27ac	LD VDR	1	3.13	Transport	No	Membrane
SMIM3	chr5	150157508	150158534	VDR, H3K4me3, H3K27ac & PU.1	LD H3K4me3 & VDR	150159377	150161047	2.704	No	VDR, CEBPA, PU.1, H3K4me3 & H3K27ac	LD H3K4me3	1	2.52	Undefined	No	Membrane
SMPDL3A	chr6	123109971	123110603	VDR, H3K4me3, H3K27ac & PU.1	LD H3K4me3 & H3K27ac	123111490	123112758	2.153	No	VDR, CEBPA, PU.1, H3K4me3 & H3K27ac	LD CEBPA, PU.1, H3K4me3 & H3K27ac	1	3.82	Enzyme	No	Extracellular
SP100	chr2	231280871	231281043	VDR, H3K4me3, H3K27ac, PU.1 & CEBPA	LD H3K4me3 & VDR	231275565	231277755	4.211	No	VDR, CEBPA, H3K4me3 & H3K27ac	LD H3K4me3	1	1.75	transcriptional coactivator of ETS1 and ETS2	Yes	Nucleus
SSH1	chr12	109221179	109221181	VDR, H3K4me3 & H3K27ac	LD H3K4me3 & VDR	109238563	109241542	18.8735	No	VDR, CEBPA, PU.1 & H3K27ac	LD VDR & CEBPA	1	1.53	Enzyme	No	Cytosol
ST3GAL1	chr8	134583936	134584183	VDR, H3K4me3, H3K27ac & PU.1	LD H3K4me3	134582377	134583623	0.936	Yes	VDR, CEBPA, PU.1, H3K4me3 & H3K27ac	LD H3K4me3	1	2.74	Enzyme	No	Golgi apparatus
STEAP3	chr2	119981384	119981464	VDR, H3K4me3, H3K27ac & PU.1	LD H3K4me3	120039479	120042183	59.447	No	VDR, CEBPA, PU.1, H3K4me3 & H3K27ac	LD H3K4me3	1	2.38	Transport	No	Membrane
SYK	chr9	93564012	93564175	VDR, H3K4me3, H3K27ac & PU.1	LD H3K4me3	93564720	93565464	1.08	No	VDR, CEBPA, PU.1, H3K4me3 & H3K27ac	LD H3K4me3	1	1.49	Enzyme	Yes	Membrane
TESPA1	chr12	55367395	55367516	VDR, H3K27ac & PU.1	LD H3K27ac & VDR	55239896	55241791	126.552	No	VDR, CEBPA, PU.1 & H3K27ac	LD H3K27ac	1	5.26	Signal transduction	Yes	Nucleus
TMCO6	chr5	140019012	140019197	VDR, H3K4me3, H3K27ac, PU.1 & CEBPA	LD H3K4me3	139985811	139989553	31.33	No	VDR, CEBPA, PU.1 & H3K27ac	LD VDR, CEBPA, PU.1 & H3K27ac	1	1.69	Transport	No	Membrane
TMEM156	chr4	39033931	39033933	VDR, H3K27ac & PU.1	no LD	38745301	38746057	288.252	No	VDR, PU.1, H3K4me3 & H3K27ac	LD H3K4me3	1	2.64	Undefined	No	Membrane
TMEM215	chr9	32783497	32783803	VDR, H3K4me3 & H3K27ac	LD H3K4me3	32727896	32729312	54.893	No	VDR, CEBPA, PU.1 & H3K27ac	LD VDR & H3K27ac	1	13.84	Undefined	No	Membrane
TMEM37	chr2	120189446	120189500	VDR, H3K4me3, H3K27ac & PU.1	LD H3K4me3	120183170	120187305	4.2085	No	VDR, CEBPA, PU.1 & H3K27ac	LD VDR & PU.1	1	36.47	Stabilizes calcium channels in an inactivated (closed) state	No	Membrane
TREM1	chr6	41254391	41254393	VDR & CEBPA	LD CEBPA	41469838	41473086	217.071	No	VDR, CEBPA, PU.1, H3K4me3 & H3K27ac	LD VDR & H3K4me3	1	34.15	Receptor	Yes	Membrane
TRIM38	chr6	25962917	25963083	VDR, H3K4me3, H3K27ac & PU.1	LD H3K4me3 & PU.1	25992090	25993488	29.872	No	PU.1, H3K4me3 & H3K27ac	LD PU.1 & H3K4me3	1	2.2	Enzyme	Yes	Cytosol
VAV1	chr19	6772679	6773022	VDR, H3K4me3,H3K27ac & PU.1	no LD	6800783	6803548	29.4865	No	VDR, PU.1, H3K4me3 & H3K27ac	LD H3K4me3	1	1.98	Guanine nucleotide exchange factor	Yes	Membrane
WDR55	chr5	140044384	140044688	VDR, H3K4me3, H3K27ac & PU.1	LD H3K4me3	140043424	140044370	0.487	Yes	VDR, PU.1, H3K4me3 & H3K27ac	LD H3K4me3	1	1.73	Nucleolar protein that acts as a modulator of rRNA synthesis	No	Nucleus
ZNF44	chr19	12405507	12405714	VDR, H3K4me3, H3K27ac & PU.1	LD H3K4me3 & VDR	12403992	12405476	0.773	Yes	VDR, PU.1, H3K4me3 & H3K27ac	LD VDR & H3K4me3	1	1.93	Nucleic acid binding	No	Nucleus
CD1D	chr1	158149737	158149952	VDR, H3K4me3, H3K27ac & PU.1	LD H3K4me3 & H3K27ac	158150163	158151598	1.1435	No	VDR, CEBPA, H3K4me3 & H3K27ac	no LD	2	3	Antigen presentation	Yes	Membrane
DUSP10	chr1	221910185	221910802	VDR, H3K4me3 & H3K27ac	LD H3K4me3	221879356	221883505	28.7545	No	VDR, CEBPA, PU.1 & H3K27ac	no LD	2	2.89	Enzyme	No	Cytosol
FAM43A	chr3	194406622	194409766	VDR, H3K4me3, H3K27ac & PU.1	LD H3K4me3	194456930	194458687	51.1865	No	VDR, PU.1 & H3K27ac	no LD	2	4.63	Undefined	No	Nucleus
FRAT1	chr10	99079022	99081672	VDR, H3K4me3, H3K27ac & PU.1	no LD	99077620	99078268	1.078	No	VDR, H3K4me3 & H3K27ac	no LD	2	2.99	Inhibits GSK-3-mediated phosphorylation of beta-catenin and positively regulates the Wnt signaling	No	Cytosol
KCTD12	chr13	77460281	77460283	VDR, H3K4me3, H3K27ac, PU.1 & CEBPA	LD H3K4me3	77453029	77454631	6.451	No	VDR, CEBPA, PU.1 & H3K27ac	no LD	2	8.97	Transport	No	Extracellular
LGALS9	chr17	25958174	25958330	VDR, H3K4me3, H3K27ac & PU.1	no LD	25959302	25960487	1.7205	No	VDR, PU.1, H3K4me3 & H3K27ac	no LD	2	1.6	Galectin, cell-cell interactions	No	Extracellular
LILRB4	chr19	55174124	55174519	VDR, H3K4me3, H3K27ac & PU.1	LD H3K4me3	55171884	55173104	1.63	No	VDR, PU.1, H3K4me3 & H3K27ac	no LD	2	2.66	Receptor	Yes	Membrane
LRRC8A	chr9	131644391	131644529	VDR, H3K4me3 & H3K27ac	LD VDR	131661216	131662851	17.6425	No	CEBPA, H3K27ac & PU.1	no LD	2	3.82	Transport	No	Membrane
LTB4R	chr14	24780705	24781010	VDR, PU.1 & CEBPA	no LD	24782131	24783037	1.879	No	VDR, CEBPA, PU.1 & H3K27ac	no LD	2	2.04	Receptor	Yes	Membrane
NAPSB	chr19	50847930	50848005	VDR, H3K4me3, H3K27ac & PU.1	LD H3K4me3	50843710	50845447	3.3515	No	VDR, CEBPA, PU.1 & H3K27ac	no LD	2	2.64	Pseudogene	No	-
NCF4	chr22	37257030	37257245	VDR, H3K4me3, H3K27ac & PU.1	no LD	37257796	37259618	1.677	No	VDR, PU.1, H3K4me3 & H3K27ac	no LD	2	1.62	Enzyme	Yes	Cytosol
PEX5L	chr3	179691804	179692008	VDR, H3K4me3, H3K27ac & PU.1	LD H3K4me3	179675550	179676660	15.699	No	VDR, CEBPA, PU.1 & H3K27ac	no LD	2	2.9	Subunit of hyperpolarization-activated cyclic nucleotide-gated (HCN) channel	No	Cytosol
PRICKLE1	chr12	42877178	42877416	VDR, H3K4me3 & H3K27ac	LD H3K4me3 & H3K27ac	43088993	43093983	214.31	No	VDR, CEBPA, PU.1 & H3K27ac	no LD	2	1.69	Nuclear receptor	No	Nucleus
RAB3D	chr19	11450145	11450344	VDR, H3K4me3, H3K27ac & PU.1	no LD	11434289	11436095	14.953	No	VDR, CEBPA, PU.1 & H3K27ac	no LD	2	1.85	Transport	No	Membrane
ROBO4	chr11	124767689	124767691	VDR, H3K27ac & PU.1	no LD	124864225	124865074	96.9605	No	VDR, CEBPA, PU.1 & H3K27ac	no LD	2	5.22	Receptor	No	Extracellular
SDS	chr12	113841573	113841692	VDR, H3K4me3, H3K27ac & PU.1	no LD	113899963	113900850	58.8335	No	VDR & H3K4me3	no LD	2	2.65	Enzyme	No	Cytosol
SHE	chr1	154474500	154474502	VDR, H3K4me3, H3K27ac, PU.1 & CEBPA	LD H3K4me3, H3K27ac & CEBPA	154465599	154466221	8.59	No	VDR, PU.1, H3K4me3 & H3K27ac	no LD	2	12	Signal transduction	No	Membrane
SRA1	chr5	139937035	139937037	VDR, H3K4me3, H3K27ac & PU.1	LD H3K4me3	139973901	139976226	38.0285	No	VDR, CEBPA, PU.1 & H3K27ac	no LD	2	1.92	regulation of many NR and non-NR activities	No	Nucleus
THBD	chr20	23030139	23030141	VDR, H3K4me3, H3K27ac & PU.1	LD H3K4me3 & PU.1	23093906	23098144	65.886	No	VDR, CEBPA, PU.1 & H3K27ac	no LD	2	4.53	Receptor	No	Membrane
TMEM86A	chr11	18720351	18720454	VDR, H3K4me3 & H3K27ac	LD H3K4me3	18721089	18722276	1.3315	No	VDR, PU.1 & H3K27ac	no LD	2	3.21	Undefined	No	Membrane
TRAF3IP3	chr1	209929394	209929654	VDR, H3K4me3, H3K27ac, PU.1 & CEBPA	LD VDR & PU.1	209929872	209930783	0.9335	Yes	VDR, PU.1, H3K4me3 & H3K27ac	no LD	2	2.22	Signal transduction	Yes	Nucleus
XKR8	chr1	28286504	28286873	VDR, H3K4me3, H3K27ac & PU.1	LD H3K4me3 & VDR	28269584	28270941	16.2415	No	VDR, CEBPA, PU.1 & H3K27ac	no LD	2	2	Promotes phosphatidylserine exposure on apoptotic cell surface	Yes	Membrane
ZNF589	chr3	48282596	48282704	VDR, H3K4me3 & H3K27ac	LD H3K4me3	48273958	48275461	7.8865	No	VDR, PU.1 & H3K27ac	no LD	2	4.23	May play a role as a DNA binding-dependent transcriptional repressor.	No	Nucleus
ABCB4	chr7	87104950	87105019	H3K4me3 & H3K27ac	LD H3K4me3	87103103	87104459	1.169	No	VDR, CEBPA, PU.1, H3K4me3 & H3K27ac	LD VDR &H3K4me3	3	3.81	Transport	No	Membrane
ACVR1B	chr12	52345451	52345618	H3K4me3, H3K27ac & PU.1	LD H3K4me3 & H3K27ac	52364533	52367294	20.4625	No	VDR, CEBPA, PU.1 & H3K27ac	LD VDR & H3K27ac	3	2.84	Receptor	Yes	Membrane
AIG1	chr6	143382023	143382203	H3K4me3, H3K27ac & PU.1	LD H3K4me3	143385499	143387236	4.3445	No	VDR & H3K27ac	LD VDR	3	3.09	Androgen-regulated growth of hair follicles	No	Membrane
APCDD1	chr18	10454625	10455036	H3K4me3 & H3K27ac	LD H3K4me3 & H3K27ac	10482779	10484459	28.994	No	VDR, CEBPA, PU.1 & H3K27ac	LD PU.1	3	2.2	Inhibitor of the Wnt signaling pathway	No	Membrane
ASAP2	chr2	9346894	9347359	H3K4me3 & H3K27ac	LD H3K4me3	9400047	9402452	54.3555	No	VDR, CEBPA, PU.1, H3K4me3 & H3K27ac	LD VDR, CEBPA & H3K27ac	3	7.51	GTPase activator activity and enzyme activator activity	No	Membrane
B3GNT8	chr19	41934501	41934635	H3K4me3, H3K27ac & PU.1	LD H3K4me3 & H3K27ac	41930333	41931756	3.4565	No	VDR, CEBPA & H3K27ac	LD H3K27ac	3	3.1	Enzyme	No	Extracellular
BCL6	chr3	187452657	187452695	H3K4me3 & H3K27ac	LD H3K4me3	187456587	187459505	5.389	No	VDR, PU.1, H3K4me3 & H3K27ac	LD H3K4me3	3	2.21	Transcription factor	Yes	Nucleus
CCR1	chr3	46249773	46249832	H3K4me3, H3K27ac & PU.1	LD H3K4me3 & H3K27ac	46250951	46251870	1.6375	No	VDR, PU.1 & H3K27ac	LD PU.1 & H3K27ac	3	1.97	Receptor	Yes	Membrane
CCRL2	chr3	46448721	46448993	H3K4me3, H3K27ac & PU.1	no LD	46434602	46435775	13.5325	No	VDR, CEBPA & H3K27ac	LD CEBPA & H3K27ac	3	2.09	Undefined	No	Membrane
CD93	chr20	23066827	23066829	H3K4me3, H3K27ac & PU.1	LD H3K4me3 & H3K27ac	23067263	23068757	1.183	No	VDR, PU.1, H3K4me3 & H3K27ac	LD PU.1, H3K4me3 & H3K27ac	3	1.71	Intercellular adhesion	Yes	Membrane
CENPV	chr17	16256748	16256750	H3K4me3 & H3K27ac	LD H3K4me3	16188603	16191861	66.516	No	VDR, PU.1, H3K4me3 & H3K27ac	LD VDR & H3K4me3	3	1.45472	Centromere protein	No	Nucleus
CHST3	chr10	73724120	73724452	H3K4me3, H3K27ac & PU.1	LD H3K4me3	73697347	73700081	25.406	No	VDR, PU.1 & H3K27ac	LD VDR & H3K27ac	3	1.62	Enzyme	No	Membrane
CRYZL1	chr21	35013987	35014160	H3K4me3, H3K27ac & PU.1	LD H3K4me3	34991601	34992974	21.6995	No	VDR, CEBPA, PU.1 & H3K27ac	LD VDR & CEBPA	3	1.76	Enzyme	No	Cytosol
CYTH4	chr22	37678495	37678629	H3K4me3, H3K27ac & PU.1	LD H3K4me3	37696256	37697418	18.342	No	VDR, PU.1, H3K4me3 & H3K27ac	LD H3K4me3	3	2.47	Guanine-nucleotide exchange protein	No	Membrane
DPF3	chr14	73360794	73360796	H3K4me3 & H3K27ac	LD H3K4me3	73165109	73168608	193.935	No	VDR, CEBPA, PU.1 & H3K27ac	LD CEBPA	3	13.36	Transcription regulator that binds acetylated histones	No	Nucleus
ELL2	chr5	95297423	95297425	H3K4me3 & H3K27ac	LD H3K4me3 & H3K27ac	95259608	95260860	37.189	No	VDR, CEBPA, PU.1 & H3K27ac	LD CEBPA	3	2.22	Elongation factor component of the super elongation complex	Yes	Nucleus
FANCE	chr6	35420138	35420570	H3K4me3 & H3K27ac	LD H3K4me3	35428836	35429547	9.0535	No	VDR, CEBPA, PU.1 & H3K27ac	LD VDR & H3K27ac	3	5.78	Fanconi anemia pathway	No	Nucleus
FGD3	chr9	95709601	95710011	H3K4me3 & H3K27ac	LD H3K4me3 & H3K27ac	95725848	95728335	17.4905	No	VDR, CEBPA, PU.1, H3K4me3 & H3K27ac	LD H3K4me3	3	2.89	Guanyl-nucleotide exchange factor	No	Cytosol
GPT2	chr16	46918308	46918379	H3K4me3, H3K27ac & PU.1	LD H3K4me3 & PU.1	46925627	46926333	7.672	No	VDR & H3K27ac	LD H3K27ac	3	3.37	Enzyme	No	Mitochondrion
GRK5	chr10	120967197	120967481	H3K4me3, H3K27ac & PU.1	LD H3K4me3	120965388	120967061	0.9725	Yes	VDR, PU.1, H3K4me3 & H3K27ac	LD H3K4me3	3	5.37	Enzyme	No	Membrane
HTT	chr4	3076408	3076815	H3K4me3, H3K27ac & PU.1	LD H3K4me3	3080921	3082334	5.2195	No	VDR, PU.1 & H3K27ac	LD VDR	3	4.14	Huntingtin protein	No	Cytosol
IRS1	chr2	227663452	227663454	H3K4me3 & H3K27ac	LD H3K4me3 & H3K27ac	227656005	227657117	6.891	No	VDR, H3K4me3 & H3K27ac	LD VDR, H3K4me3 & H3K27ac	3	3.64	Signal transduction	No	Membrane
ITGAM	chr16	31271288	31271413	H3K4me3, H3K27ac & PU.1	LD H3K4me3 & H3K27ac	31264758	31265690	6.064	No	VDR, CEBPA, PU.1 & H3K27ac	LD PU.1	3	7.81	Integrin	Yes	Membrane
JAG1	chr20	10654176	10654178	H3K4me3 & H3K27ac	LD H3K4me3	10485023	10486484	168.423	No	VDR, CEBPA, PU.1 & H3K27ac	LD VDR, PU.1 & H3K27ac	3	1.71	Ligand for notch 1	No	Membrane
KCNF1	chr2	11052063	11054351	H3K4me3 & H3K27ac	LD H3K4me3	11111577	11113681	60.566	No	VDR, CEBPA, PU.1 & H3K27ac	LD PU.1	3	21.4	Transport	No	Membrane
KIAA1324	chr1	109656585	109656958	H3K4me3 & H3K27ac	LD H3K4me3 & H3K27ac	109643019	109643810	13.1705	No	VDR, H3K4me3 & H3K27ac	LD H3K4me3	3	1.99	Transmembrane protein	No	Membrane
MAPK13	chr6	36098261	36098478	H3K4me3 & H3K27ac	LD H3K4me3	36097239	36098239	0.522	Yes	VDR, H3K4me3 & H3K27ac	LD VDR & H3K4me3	3	2.57	Enzyme	Yes	Cytosol
MS4A7	chr11	60145958	60146089	H3K4me3, H3K27ac, PU.1 & CEBPA	LD H3K4me3	60144925	60145722	0.6345	Yes	VDR, PU.1, H3K4me3 & H3K27ac	LD H3K4me3	3	0.52	Signal transduction	No	Membrane
NMNAT2	chr1	183273872	183273874	H3K4me3 & PU.1	LD H3K4me3	183247632	183250983	24.5645	No	VDR, CEBPA, PU.1 & H3K27ac	LD VDR & CEBPA	3	8.38	Enzyme	No	Golgi apparatus
NMUR1	chr2	232395070	232395182	H3K4me3 & H3K27ac	no LD	232409864	232411430	15.577	No	VDR, CEBPA, PU.1 & H3K27ac	LD VDR & H3K27ac	3	2.32	Receptor	No	Membrane
NOD2	chr16	50731050	50731227	H3K4me3 & H3K27ac	LD H3K4me3	50729352	50730154	1.297	No	VDR, CEBPA, PU.1 & H3K27ac	LD PU.1	3	1.88	Protein kinase binding and peptidoglycan binding	Yes	Membrane
NPTX1	chr17	78450244	78450246	H3K4me3	LD H3K4me3	78753209	78756219	304.47	No	VDR, CEBPA, PU.1, H3K4me3 & H3K27ac	LD H3K4me3 & H3K27ac	3	0.14	Pentraxin	No	Extracellular
NT5DC3	chr12	104234932	104234934	H3K4me3 & H3K27ac	LD H3K4me3	104220858	104223660	12.673	No	VDR, CEBPA, PU.1 & H3K27ac	LD VDR	3	1.97	Enzyme	No	Mitochondrion
PDGFA	chr7	558636	558638	H3K4me3 & H3K27ac	LD H3K4me3	561558	562793	3.5395	No	VDR, CEBPA, PU.1 & H3K4me3	LD VDR & PU.1	3	2.97	Growth factor subunit	No	Extracellular
PDGFRL	chr8	17433942	17434269	H3K4me3, H3K27ac & PU.1	LD H3K27ac	17206289	17208066	226.764	No	VDR, CEBPA, PU.1, H3K4me3 & H3K27ac	LD VDR	3	2.22	Ttumor suppressor	No	Extracellular
PDZD7	chr10	102790830	102790914	H3K4me3 & H3K27ac	LD H3K4me3	102786455	102789719	2.743	No	VDR, CEBPA, PU.1, H3K4me3 & H3K27ac	LD VDR &H3K4me3	3	6.75	Ciliary protein	No	Extracellular
PFKFB4	chr3	48594208	48594210	H3K4me3 & H3K27ac	LD H3K4me3	48595262	48599104	2.975	No	VDR, PU.1, H3K4me3 & H3K27ac	LD H3K4me3	3	3.91	Enzyme	No	Cytosol
PKD2	chr4	88928799	88929480	H3K4me3 & H3K27ac	LD H3K4me3	88948816	88950726	20.972	No	VDR, CEBPA, PU.1 & H3K27ac	LD VDR & H3K27ac	3	1.86	Transport	No	Membrane
PLEKHO1	chr1	150122170	150122477	H3K4me3 & H3K27ac	LD H3K4me3	150130839	150134000	10.2495	No	VDR, CEBPA, PU.1, H3K4me3 & H3K27ac	LD VDR & PU.1	3	2.41	Regulation of the actin cytoskeleton	No	Membrane
RAB11FIP1	chr8	37756957	37756959	H3K4me3 & H3K27ac	LD H3K4me3	37757199	37759065	1.175	No	VDR, CEBPA, PU.1, H3K4me3 & H3K27ac	LD VDR, CEBPA & H3K4me3	3	2.2	Recycling of vesicles	No	Cytosol
RAB20	chr13	111213864	111213866	H3K4me3, H3K27ac, PU.1, & EBPA	LD H3K4me3	111188307	111189364	25.0285	No	VDR, PU.1 & H3K27ac	LD VDR & H3K27ac	3	2.69	Intracellular trafficking	No	Golgi apparatus
SCARB1	chr12	125348264	125348266	H3K4me3, H3K27ac & PU.1	LD H3K4me3	125335569	125338433	11.263	No	VDR, CEBPA, PU.1 & H3K27ac	LD VDR	3	2.45	Receptor	No	Membrane
SERINC2	chr1	31882412	31882699	H3K4me3, H3K27ac & PU.1	LD H3K4me3 & H3K27ac	31868831	31871582	12.2055	No	VDR, PU.1 & H3K27ac	LD PU.1	3	4.06	Transport	No	Extracellular
TFE3	chrX	48900750	48900752	H3K4me3 & H3K27ac	LD H3K4me3	48876593	48877877	23.515	No	VDR, CEBPA & H3K27ac	LD CEBPA	3	2.65	Transcription factor	No	Nucleus
THEMIS2	chr1	28199055	28199176	H3K4me3 & H3K27ac	LD H3K4me3	28210631	28212840	12.6805	No	VDR, CEBPA, PU.1, H3K4me3 & H3K27ac	LD VDR, CEBPA & H3K4me3	3	4.23	Control point in macrophage inflammatory response	Yes	Nucleus
TRAF5	chr1	211499957	211500015	H3K4me3 & H3K27ac	LD H3K4me3	211688069	211689610	188.882	No	VDR, PU.1, H3K4me3 & H3K27ac	LD VDR & H3K4me3	3	2.58	Signal transduction	No	Cytosol
TUBB4A	chr19	6502221	6502223	H3K4me3 & H3K27ac	LD H3K4me3	6498364	6499241	3.4185	No	VDR, PU.1 & H3K27ac	LD PU.1	3	6.58	Beta tubulin	No	Cytoskeleton
USP2	chr11	119234703	119234705	H3K4me3 & H3K27ac	LD H3K4me3	119236752	119240714	4.03	No	VDR, CEBPA, H3K4me3 & H3K27ac	LD VDR	3	4.71	Enzyme	Yes	Nucleus
VPS37B	chr12	123380607	123380609	H3K4me3, H3K27ac & PU.1	LD H3K4me3	123371620	123374010	7.792	No	VDR, CEBPA, PU.1, H3K4me3 & H3K27ac	LD VDR, PU.1, H3K4me3 & H3K27ac	3	1.92	Calcium-dependent protein binding	No	Membrane
WLS	chr1	68697980	68697982	H3K4me3 & PU.1	LD H3K4me3	68803465	68805042	106.273	No	VDR, CEBPA, PU.1 & H3K27ac	LD CEBPA	3	2.17	Signal transduction	No	Extracellular
ZDHHC18	chr1	27153201	27153630	H3K4me3 & H3K27ac	LD H3K4me3	27154942	27155931	2.2355	No	VDR, PU.1, H3K4me3 & H3K27ac	LD VDR & H3K4me3	3	3.06	Enzyme	No	Golgi apparatus
ZFP36	chr19	39897487	39897568	H3K4me3, H3K27ac & PU.1	LD H3K4me3	39891281	39895291	4.201	No	VDR, PU.1, H3K4me3 & H3K27ac	LD H3K4me3	3	2.06	Zinc-finger RNA-binding protein	No	Nucleus
ADAMTS10	chr19	8675529	8675588	H3K4me3, H3K27ac & PU.1	LD H3K4me3	8747214	8748291	72.2235	No	VDR, CEBPA, PU.1, H3K4me3 & H3K27ac	no LD	4	4.74	Enzyme	No	Extracellular
CDON	chr11	125933121	125933187	H3K4me3 & H3K27ac	no LD	126019361	126020373	86.746	No	VDR, PU.1 & H3K27ac	no LD	4	1.35	Receptor	No	Membrane
CLMN	chr14	95786127	95786129	H3K4me3 & H3K27ac	LD H3K4me3	95778356	95782689	5.6045	No	VDR, CEBPA, PU.1 & H3K27ac	no LD	4	39.92	Actin binding	No	Cytosol
CRISPLD2	chr16	84853587	84853739	H3K4me3	no LD	84843977	84845332	8.9325	No	VDR, CEBPA, PU.1 & H3K27ac	no LD	4	2.16	Heparin binding and glycosaminoglycan binding	Yes	Extracellular
CYP26B1	chr2	72374961	72374963	H3K4me3	LD H3K4me3	72370072	72370932	4.459	No	VDR, PU.1 & H3K4me3	no LD	4	48.31	Enzyme	No	Membrane
DNAH10	chr12	124247042	124247097	H3K4me3, H3K27ac & PU.1	LD H3K4me3 & H3K27ac	124361962	124363081	115.48	No	VDR, CEBPA, PU.1 & H3K27ac	no LD	4	2.34	Microtubule-associated motor protein	No	Cytoskeleton
ENTPD7	chr10	101419263	101419345	H3K4me3 & H3K27ac	LD H3K4me3	101416890	101417762	1.937	No	VDR, CEBPA, PU.1 & H3K27ac	no LD	4	1.87	Enzyme	No	Membrane
FUCA1	chr1	24194774	24194776	H3K4me3, H3K27ac & PU.1	LD H3K4me3	24191814	24192632	2.551	No	VDR, PU.1 & H3K27ac	no LD	4	2.15	Enzyme	No	Lysosome
FXYD6	chr11	117747307	117747746	H3K4me3	LD H3K4me3	117712331	117713530	34.3765	No	VDR, CEBPA, PU.1 & H3K27ac	no LD	4	2.75	Affects the activity of Na,K-ATPase	No	Membrane
GJD3	chr17	38520065	38520067	H3K4me3 & H3K27ac	LD H3K4me3	38527841	38530181	8.946	No	VDR & H3K27ac	no LD	4	19.27	Transport	No	Membrane
GMPR	chr6	16238811	16239011	H3K4me3, H3K27ac & PU.1	LD H3K4me3	16236667	16237365	1.795	No	VDR, CEBPA, PU.1 & H3K4me3	no LD	4	2.36	Enzyme	No	Cytosol
HBEGF	chr5	139725911	139725913	H3K4me3 & H3K27ac	LD H3K4me3	139721112	139723360	3.675	No	VDR, CEBPA, PU.1 & H3K27ac	no LD	4	5.26	Growth factor	No	Membrane
IRF5	chr7	128577994	128578103	H3K4me3, H3K27ac & PU.1	LD H3K4me3	128574255	128575793	2.97	No	VDR, CEBPA, PU.1, H3K4me3 & H3K27ac	no LD	4	1.73	Transcription factor	Yes	Nucleus
ITGB5	chr3	124605845	124605847	H3K4me3 & H3K27ac	LD H3K4me3	124597373	124598232	8.0425	No	VDR, PU.1 & H3K27ac	no LD	4	6.18	Receptor	Yes	Membrane
LFNG	chr7	2552163	2552335	H3K4me3 & H3K27ac	LD H3K4me3 & H3K27ac	2550118	2551774	1.217	No	VDR, PU.1, H3K4me3 & H3K27ac	no LD	4	2.71	Enzyme	No	Extracellular
LRP12	chr8	105601123	105601125	H3K4me3, H3K27ac & PU.1	LD H3K4me3	105629893	105630726	29.1865	No	VDR, CEBPA, PU.1 & H3K27ac	no LD	4	2.05	Transmembrane protein, may be receptor	No	Membrane
LTC4S	chr5	179220986	179221139	H3K4me3, H3K27ac & PU.1	LD H3K4me3	179218736	179220204	1.516	No	VDR, PU.1 & H3K27ac	no LD	4	2.5	Enzyme	Yes	Membrane
MARCKS	chr6	114178527	114179023	H3K4me3 & H3K27ac	LD H3K4me3	114201978	114203334	24.129	No	VDR, CEBPA, PU.1 & H3K27ac	no LD	4	3.13	Actin filament crosslinking protein	No	Cytoskeleton
NINJ1	chr9	95896497	95896499	H3K4me3 & H3K27ac	LD H3K4me3	95880990	95883708	14.148	No	VDR, CEBPA, PU.1 & H3K27ac	no LD	4	4.96	Homophilic cell adhesion molecule that promotes axonal growth	No	Membrane
NRCAM	chr7	107880506	107880508	H3K4me3	LD H3K4me3	108339959	108340895	459.921	No	VDR	no LD	4	0.84	Neuron adhesion	No	Membrane
PDCD1LG2	chr9	5510545	5510803	H3K4me3, H3K27ac, PU.1, CEBPA & PU.1	LD H3K4me3 & H3K27ac	5520911	5521954	10.8875	No	VDR, CEBPA, PU.1 & H3K27ac	no LD	4	3.08	Signal transduction	Yes	Membrane
PKP2	chr12	33049663	33049665	H3K4me3 & H3K27ac	LD H3K4me3	32740412	32743117	307.899	No	VDR, CEBPA, PU.1 & H3K27ac	no LD	4	2.12	Plakophilin	No	Membrane
SEL1L3	chr4	25864456	25864458	H3K4me3 & H3K27ac	LD H3K4me3	25881602	25883625	18.1575	No	VDR, CEBPA, PU.1, H3K4me3 & H3K27ac	no LD	4	2.73	Undefined	No	Nucleus
SPRY4	chr5	141704409	141704620	H3K4me3, H3K27ac & CEBPA	LD H3K4me3	141765956	141767121	62.1295	No	VDR, PU.1 & H3K27ac	no LD	4	3.92	Signal transduction	No	Membrane
SYT3	chr19	51140666	51140668	H3K4me3 & H3K27ac	no LD	51115837	51116564	24.4655	No	VDR	no LD	4	3.44	Ca(2+) sensor	No	Endosome
TBC1D2	chr9	100975492	100975494	H3K4me3, H3K27ac & PU.1	LD H3K4me3	101010380	101011848	35.622	No	VDR, CEBPA, PU.1 & H3K27ac	no LD	4	2.18	Transport	No	Nucleus
ADAM28	chr8	24151580	24151708	H3K27ac, PU.1 & CEBPA	LD H3K27ac	24129263	24130003	21.947	No	VDR, PU.1 & H3K27ac	no LD	unclassified	8.46	Enzyme	No	Membrane
ARL5C	chr17	37322011	37322013	H3K27ac	no LD	37331321	37333236	10.2675	No	VDR, PU.1 & H3K27ac	no LD	unclassified	5.23	Binds and exchanges GTP and GDP	No	Cytosol
BTNL9	chr5	180467225	180467432	no peaks	no peaks	180478864	180481326	12.87	No	VDR, PU.1, H3K4me3 & H3K27ac	LD H3K4me3	unclassified	2.64	Undefined	No	Membrane
CXCL10	chr4	76944582	76944584	no peaks	no peaks	77119063	77121825	175.862	No	VDR, PU.1 & H3K27ac	no LD	unclassified	0.28	Chemotactic for monocytes and T-lymphocytes. Binds to CXCR3	Yes	Extracellular
CYP19A1	chr15	51630692	51630795	unclear	unclear	51622705	51623767	7.456	No	VDR, PU.1 & H3K27ac	LD PU.1	unclassified	3.59	Enzyme	No	Membrane
FBXO41	chr2	73496756	73496758	no peaks	no peaks	73510628	73512886	15.001	No	VDR, PU.1, H3K4me3 & H3K27ac	LD VDR & H3K4me3	unclassified	1.85	Substrate-recognition component of the SCF-type E3 ubiquitin ligase complex	No	Cytosol
FOXF1	chr16	86544133	86545154	PU.1	LD PU.1	86542498	86543275	1.2465	No	VDR, PU.1, H3K4me3 & H3K27ac	LD H3K4me3 & H3K27ac	unclassified	6.91	Transcription factor	No	Nucleus
GABRG2	chr5	161494648	161495112	no peaks	no peaks	161463650	161464885	30.3805	No	VDR, H3K4me3 & H3K27ac	LD H3K4me3	unclassified	1.73	Receptor	No	Membrane
IL7R	chr5	35856977	35857161	H3K27ac & PU.1	LD PU.1	35908331	35909411	51.894	No	VDR, PU.1 & H3K27ac	no LD	unclassified	0.59	Receptor	Yes	Membrane
LRRC3B	chr3	26664300	26664728	no peaks	no peaks	26583097	26583884	80.8095	No	VDR, CEBPA, PU.1 & H3K27ac	no LD	unclassified	2.28	Tumor suppressor	No	Membrane
NCF1	chr7	74188309	74188450	no peaks	no peaks	74075075	74075695	112.924	No	VDR, CEBPA, PU.1, H3K4me3 & H3K27ac	LD PU.1 & H3K4me3	unclassified	3.77	Enzyme	No	Membrane
NCF1B	chr7	72634674	72634752	no peaks	no peaks	72275676	72277262	358.205	No	VDR, CEBPA, PU.1 & H3K27ac	no LD	unclassified	9.41	Pseudogene	No	-
NCF1C	chr7	74587676	74587816	no peaks	no peaks	74075075	74075695	512.291	No	VDR, CEBPA, PU.1, H3K4me3 & H3K27ac	LD PU.1 & H3K4me3	unclassified	5.89	Pseudogene	No	-
NR1I2	chr3	119499331	119501147	H3K27ac	no LD	119526605	119529434	28.6885	No	VDR, PU.1, H3K4me3 & H3K27ac	LD VDR, H3K4me3 & H3K27ac	unclassified	5.59	Transcription factor	No	Nucleus
ORM1	chr9	117085303	117085527	no peaks	no peaks	117110860	117112043	26.1485	No	VDR & H3K27ac	no LD	unclassified	126.45	Acute phase plasma protein, induced in inflammation	Yes	Extracellular
OTOF	chr2	26700759	26700761	no peaks	no peaks	26724436	26726857	24.8875	No	VDR, H3K4me3 & H3K27ac	LD VDR & H3K4me3	unclassified	13.05	Ca(2+) sensor	No	Cytosol
PNOC	chr8	28174649	28174833	PU.1	no LD	28195698	28197306	21.853	No	VDR, CEBPA, PU.1, H3K4me3 & H3K27ac	LD H3K4me3 & H3K27ac	unclassified	4.26	Ligand of the opioid receptor-like receptor OPRL1	No	Extracellular
PPP1R27	chr17	79792827	79792829	no peaks	no peaks	79795195	79796558	3.0495	No	VDR, CEBPA, H3K4me3 & H3K27ac	LD H3K4me3	unclassified	1.84	Inhibits phosphatase activity of protein phosphatase 1 complexes	No	Nucleus
PTAFR	chr1	28503103	28503455	H3K27ac & PU.1	no LD	28498707	28499878	3.8105	No	VDR, PU.1 & H3K27ac	no LD	unclassified	4.17	Receptor	Yes	Membrane
RHOH	chr4	40198527	40198920	H3K27ac	no LD	40201457	40202888	3.6455	No	VDR, CEBPA, PU.1 & H3K27ac	no LD	unclassified	1.66	Enzyme	Yes	Membrane
SEMA4D	chr9	92094487	92094611	no peaks	no peaks	92054724	92058724	37.763	No	VDR, PU.1, H3K4me3 & H3K27ac	LD VDR	unclassified	2.44	Receptor	Yes	Membrane
SFXN3	chr10	102790996	102791291	H3K27ac & PU.1	LD H3K27ac	102786455	102789719	2.909	No	VDR, CEBPA, PU.1, H3K4me3 & H3K27ac	LD VDR &H3K4me3	unclassified	1.83	Transport	No	Mitochondrion
SLC35A4	chr5	139944420	139944443	no peaks	no peaks	139974353	139975663	30.588	No	VDR, CEBPA, PU.1 & H3K27ac	no LD	unclassified	1.9	Transport	No	Golgi apparatus
SRRM3	chr7	75831216	75831385	no peaks	no peaks	75910256	75911611	79.7175	No	VDR, H3K4me3 & H3K27ac	LD H3K4me3	unclassified	6.99	Undefined	No	Nucleus
STS	chrX	7137472	7137727	no peaks	no peaks	7028544	7029404	108.498	No	VDR & H3K27ac	no LD	unclassified	7.31	Enzyme	No	Membrane
TDRD10	chr1	154474695	154475505	no peaks	no peaks	154457444	154458162	16.892	No	VDR, CEBPA, PU.1 & H3K27ac	LD H3K27ac	unclassified	18.29	Undefined	No	Nucleus
TRAK1	chr3	42132746	42133052	unclear	unclear	42053132	42057451	77.4545	No	VDR, PU.1, H3K4me3 & H3K27ac	LD PU.1 & H3K27ac	unclassified	2.05	Intracellular trafficking	No	Endosome
TSPAN18	chr11	44785976	44786062	no peaks	no peaks	44658848	44661404	125.85	No	VDR, CEBPA, PU.1 & H3K27ac	LD VDR & CEBPA	unclassified	48.31	Undefined	No	Membrane
TTC39A	chr1	51787831	51787833	no peaks	no peaks	51768533	51771036	18.0465	No	VDR, PU.1, H3K4me3 & H3K27ac	LD VDR	unclassified	3.82	Undefined	No	Nucleus
